# Supplementary material for: Heart failure with preserved ejection fraction (HFpEF) pathophysiology study (IDENTIFY-HF): does increased arterial stiffness associate with HFpEF, in addition to ageing and vascular effects of comorbidities? Rationale and design
Source: PubMed Central journal article supplement — BMJ Open. 2019 Nov 19;9(11):e027984. doi: 10.1136/bmjopen-2018-027984 (PMC6886989; doi:10.1136/bmjopen-2018-027984), 2019-11-19
Supplement: bmjopen-2018-027984.draft_revisions.pdf [file bmjopen-2018-027984.draft_revisions.pdf]

# BMJ Open

BMJ Open is committed to open peer review. As part of this commitment we make the peer review history of every article we publish publicly available.

When an article is published we post the peer reviewers' comments and the authors' responses online. We also post the versions of the paper that were used during peer review. These are the versions that the peer review comments apply to.

The versions of the paper that follow are the versions that were submitted during the peer review process. They are not the versions of record or the final published versions. They should not be cited or distributed as the published version of this manuscript.

BMJ Open is an open access journal and the full, final, typeset and author-corrected version of record of the manuscript is available on our site with no access controls, subscription charges or pay-per-view fees (<http://bmjopen.bmj.com>).

If you have any questions on BMJ Open's open peer review process please email [info.bmjopen@bmj.com](mailto:info.bmjopen@bmj.com)

# BMJ Open

## The Heart Failure with Preserved Ejection Fraction (HFpEF) Pathophysiology (IDENTIFY-HF) Study;

|                               |                                                                                                                                                                                                                                                                                                                                                                                                                                                                                                                                                                                                                                                                                                                                                                                                                                                                                                                                                                                                                                                                                                                                                                                                                    |
|-------------------------------|--------------------------------------------------------------------------------------------------------------------------------------------------------------------------------------------------------------------------------------------------------------------------------------------------------------------------------------------------------------------------------------------------------------------------------------------------------------------------------------------------------------------------------------------------------------------------------------------------------------------------------------------------------------------------------------------------------------------------------------------------------------------------------------------------------------------------------------------------------------------------------------------------------------------------------------------------------------------------------------------------------------------------------------------------------------------------------------------------------------------------------------------------------------------------------------------------------------------|
| Journal:                      | <i>BMJ Open</i>                                                                                                                                                                                                                                                                                                                                                                                                                                                                                                                                                                                                                                                                                                                                                                                                                                                                                                                                                                                                                                                                                                                                                                                                    |
| Manuscript ID                 | bmjopen-2018-027984                                                                                                                                                                                                                                                                                                                                                                                                                                                                                                                                                                                                                                                                                                                                                                                                                                                                                                                                                                                                                                                                                                                                                                                                |
| Article Type:                 | Protocol                                                                                                                                                                                                                                                                                                                                                                                                                                                                                                                                                                                                                                                                                                                                                                                                                                                                                                                                                                                                                                                                                                                                                                                                           |
| Date Submitted by the Author: | 30-Nov-2018                                                                                                                                                                                                                                                                                                                                                                                                                                                                                                                                                                                                                                                                                                                                                                                                                                                                                                                                                                                                                                                                                                                                                                                                        |
| Complete List of Authors:     | <p>Ali, Danish; University Hospital Coventry, ; University of Warwick Warwick Medical School, Callan, Nualla; (a) University Hospitals Coventry and Warwickshire NHS Trust</p> <p>Ennis, Stuart; University Hospitals Coventry and Warwickshire NHS Trust, Cardiac Rehabilitation; Cardiff Metropolitan University, Cardiff Centre for Exercise &amp; Health</p> <p>Powell, Richard; University Hospitals Coventry and Warwickshire NHS Trust, Department of Cardiac Rehabilitation</p> <p>McGuire, Scott; Department of Cardiac Rehabilitation, Centre for Exercise and Health, University Hospital, Coventry, UK</p> <p>McGregor, Gordon; University Hospitals Coventry and Warwickshire NHS Trust, Cardiac Rehabilitation</p> <p>Weickert, Martin; University Hospitals Coventry &amp; Warwickshire NHS Trust, ; University of Warwick Warwick Medical School, Division of Translational and Systems Medicine</p> <p>Miller, Michelle; University of Warwick, Warwick Medical School</p> <p>Cappuccio, Francesco; University of Warwick, Warwick Medical School, Division of Health Sciences</p> <p>Banerjee, Prithwish; University Hospitals Coventry and Warwickshire NHS Trust, Department of Cardiology</p> |
| Keywords:                     | Heart Failure with Preserved Ejection Fraction, Comorbidities, Pathophysiology, Arterial stiffness                                                                                                                                                                                                                                                                                                                                                                                                                                                                                                                                                                                                                                                                                                                                                                                                                                                                                                                                                                                                                                                                                                                 |
|                               |                                                                                                                                                                                                                                                                                                                                                                                                                                                                                                                                                                                                                                                                                                                                                                                                                                                                                                                                                                                                                                                                                                                                                                                                                    |

SCHOLARONE™  
Manuscripts

1  
2  
3 **The Heart Failure with Preserved Ejection Fraction (HFpEF) Pathophysiology**  
4 **(IDENTIFY-HF) Study: does increased arterial stiffness associate with HFpEF,**  
5 **in addition to ageing and vascular effects of co-morbidities?**  
6  
7  
8  
9  
10  
11  
12

13 D. Ali (a,b), N. Callan (a), S. Ennis (c), R. Powell (c), S. McGuire (c,e), G. McGregor (c,e), M.O.  
14 Weickert (a,b,d,e), M.A. Miller (b), F.P. Cappuccio (a,b), P. Banerjee (a,b,e)  
15  
16  
17  
18  
19  
20  
21

- 22 (a) University Hospitals Coventry and Warwickshire NHS Trust, Coventry, UK  
23 (b) University of Warwick, Warwick Medical School, Coventry, UK  
24 (c) Department of Cardiac Rehabilitation, Centre for Exercise and Health, University Hospital, Coventry, UK  
25 (d) The ARDEN NET Centre, European Neuroendocrine Tumour Society (ENETS) Centre of Excellence (CoE),  
26 University Hospitals Coventry and Warwickshire NHS Trust, Coventry, UK  
27 (e) Health and Life Sciences Faculty Research Centre, Coventry University, Coventry, UK  
28  
29  
30  
31  
32  
33  
34  
35  
36  
37

38 **Keywords:** Heart Failure with Preserved Ejection Fraction, Comorbidities, Pathophysiology, Arterial  
39 stiffness  
40

41 ClinicalTrials.gov Identifier: NCT03186833  
42  
43  
44  
45  
46  
47  
48  
49  
50  
51  
52  
53  
54  
55  
56  
57  
58  
59  
60

## Abstract

### Introduction

There has been a paradigm shift proposing that comorbidities are a major contributor towards the heart failure with preserved ejection fraction (HFpEF) syndrome. Furthermore, HFpEF patients have abnormal macro and microvascular function, which may significantly contribute towards altered ventriculo-vascular coupling in these patients. The IDENTIFY-HF study is an observational study that investigates whether gradually increasing arterial stiffness (in addition to ageing) as a result of increasing common comorbidities, such as hypertension and diabetes, is associated with HFpEF.

### Methods and analysis:

Arterial compliance and microvascular function will be assessed in five groups (Groups A to E) of age, sex and BMI matched subjects (age  $\geq$  70 years in all groups):

Group A; normal healthy volunteers without major comorbidities such as hypertension and diabetes mellitus (control). Group B; patients with hypertension without diabetes mellitus or heart failure (HF). Group C; patients with hypertension and diabetes mellitus without HF. Group D, patients with HFpEF; Group E; patients with heart failure and reduced ejection fraction (HFrEF) (parallel group).

Vascular function and arterial compliance will be assessed using Pulse Wave Velocity, as the primary outcome measure. Further outcome measures include Cutaneous Laser Doppler Flowmetry as a measure of endothelial function, transthoracic echocardiography and exercise tolerance measures.

Biomarkers include NT-proBNP, high sensitivity Troponin T, as well as serum galactin-3 as a marker of fibroses.

## Ethics and dissemination

The study was approved by the regional research ethics committee (REC), West Midland and Black Country 17/WM/0039, UK and permission to conduct the study in the hospital was also obtained from the RDI, UHCW NHS Trust. The results will be published in peer-reviewed journals and presented in local, national and international medical society meetings.

## Strengths and limitations of this study

- An important observational study aimed towards the understanding of the complex pathophysiology of HFpEF.
- Will provide insight whether the HFpEF syndrome is associated with increased arterial stiffness, as a result of increasing comorbidities.
- Comprehensive study of patients with increasing comorbidities investigating macrovascular/microvascular function, echocardiographic, biochemical and metabolomics to assess endothelial function in age, sex, and BMI-matched groups.
- The limitations of the study is that groups with more comorbidities (e.g. diabetes mellitus, hypertension and chronic kidney disease) should be included to fully investigate the potential effect of increasing comorbidities on arterial stiffness, which in turn, is associated with HFpEF.

## INTRODUCTION

Heart failure (HF) is a major growing public health concern with approximately 20 million patients affected globally, posing a significant health economic burden, with an estimated cost of \$108 billion per year worldwide.<sup>1</sup> In the UK alone, approximately 5% of all emergency medical admissions are

1  
2  
3 due to heart failure with an approximate cost to the National Health Service of £1.9 billion per year.<sup>2</sup>  
4  
5 Heart failure with preserved ejection fraction (HFpEF) is reported to comprise about 50% of the total  
6  
7 heart failure burden and continues to have a high and unchanged mortality over many years, a poor  
8  
9 quality of life and similar readmission rates to HFrEF.<sup>3 4</sup> The prognosis of HFpEF is comparable to  
10  
11 systolic heart failure (SHF), now referred to as heart failure with reduced ejection fraction (HFrEF),  
12  
13 with an estimated 5-year mortality of around 50%. This is worrying as no treatments that influence  
14  
15 outcome in HFpEF have so far been found.<sup>5</sup> Most large-scale pharmacological phase III clinical trials  
16  
17 have been unsuccessful.<sup>6 7</sup> Whilst there is no single reason contributing to the negative result of  
18  
19 these trials, the most likely explanation is that our understanding of the pathophysiology of the  
20  
21 HFpEF syndrome remains incomplete and we are, therefore, currently unable to produce therapies  
22  
23 targeted at the underlying mechanisms causing the syndrome.<sup>8</sup> Therefore, in order to develop  
24  
25 evidence-based treatments in patients with HFpEF, the underlying diverse pathophysiology requires  
26  
27 further investigation.  
28  
29  
30

31  
32 Recently, there has been a shift in paradigm whereby comorbidities are thought to contribute  
33  
34 significantly to HFpEF syndrome.<sup>9</sup> Furthermore, current evidence strongly suggests that HFpEF  
35  
36 patients have abnormal macro-and microvascular function with abnormal ventricular-vascular  
37  
38 coupling.<sup>10</sup> However, the effect of comorbidities on arterial stiffness and the HFpEF syndrome  
39  
40 remains incompletely understood.  
41  
42  
43

44 This study aims to investigate the pathophysiological process of HFpEF. It tests our hypothesis  
45  
46 whether a gradual increase in arterial resistance and microvascular endothelial dysfunction due to  
47  
48 common comorbidities such as hypertension and diabetes mellitus, additionally to age-related  
49  
50 vascular and cardiac changes (mainly fibrosis and hypertrophy), contributes to the development of  
51  
52 HFpEF. This understanding will promote further research, aiding the development of new evidence-  
53  
54 based interventions and/or early prevention strategies.  
55  
56  
57  
58  
59  
60

## Hypothesis

HFpEF is a complex syndrome which is characterized by signs and symptoms of heart failure and a normal or a close to normal ejection fraction, evidence of left ventricular diastolic dysfunction, structural heart disease, altered left ventricular filling (LV) and raised brain natriuretic peptide (BNP)<sup>11</sup>. The complete pathophysiology is not known, however it is widely accepted that it is associated with cardiac and non-cardiac comorbidities<sup>12</sup>. Cardiac abnormalities include altered atrial function, subtle alterations in LV systolic function and/or chronotropic incompetence.<sup>13</sup> Non-cardiac comorbidities, for example hypertension, diabetes mellitus, anaemia, pulmonary or renal diseases and obesity may contribute to the HFpEF syndrome. In terms of pathophysiology, diastolic dysfunction is a prominent feature of HFpEF patients to which many factors contribute including both myocardial and vascular stiffening<sup>14</sup>.

HFpEF patients are known to have altered vascular function. Balmain et al. investigated the comparison in arterial compliance, venous capacitance and microvascular vasodilator function in 3 patients' groups with HFpEF, HFrEF and normal volunteers (non-HF). All the groups had coronary artery disease (CAD)<sup>15</sup>. They found that there was reduced vascular compliance (increased arterial stiffness, decreased venous capacitance) in the HFpEF group compared to the HFrEF and non-HF groups. More recently, macro-and microvascular function was compared between HFpEF and hypertensive patients.<sup>16</sup> This study found that there was decreased microvascular function with increase in arterial stiffness and depressed endothelial function in the forearm vasculature in the HFpEF group compared the hypertensive group. These studies highlight the fact that abnormal vasculature is present and may be an important contributor to the HFpEF syndrome. Although the groups in the above-mentioned studies were matched for age and sex, what remains unclear is why certain patients of the same age and sex suffer from HFpEF whilst others do not. There is good evidence that hypertension<sup>17</sup>, diabetes mellitus<sup>18</sup>, and chronic kidney disease<sup>19</sup> all increase vascular resistance on their own. Aging itself is known to be an independent risk factor for arterial stiffness

1  
2  
3 and increase in pulse wave velocity.<sup>20</sup> It is therefore reasonable to consider that HFpEF may not be  
4 due to a primary cardiac pathology but rather an end-result of non-cardiac comorbidities affecting  
5 vascular function and resistance with perhaps some secondary cardiac involvement. We  
6 hypothesized therefore, that arterial stiffness increases with comorbidities, on top of effects of  
7 normal ageing (as illustrated in Figure 1), contributing towards the HFpEF syndrome. It is possible  
8 that a gradual increase in arterial stiffness may be causing early fatigue of the cardiac muscles (as it  
9 struggles to pump into an ever-increasing high-pressure vascular circuit) resulting in elevation of left  
10 ventricular end diastolic pressure and subsequently HFpEF<sup>21</sup>.  
11  
12  
13  
14  
15  
16  
17  
18  
19  
20  
21  
22  
23  
24  
25  
26  
27  
28

## 29 **METHODS**

### 31 **Study Design**

32  
33  
34 Single-centre, observational study in 5 age, sex and BMI matched groups varying for the presence or  
35 absence of diabetes, hypertension or heart failure.  
36  
37  
38  
39  
40  
41  
42  
43  
44

### 45 **Definitions**

46  
47 Heart failure in our study is defined as: a) relevant symptoms/signs/radiographic findings as  
48 indicated by Boston criteria <sup>22</sup> and b) need for diuretic therapy. Preserved LV systolic function is  
49 defined as a LV ejection fraction (LVEF) of  $\geq 50\%$ , measured by echocardiography. Impaired LV  
50 systolic function will be defined as a LVEF of  $< 40\%$  in accordance with the European Society of  
51 Cardiology guidelines on heart failure. LVEF will be calculated using semi- quantitative assessment  
52 with 16 segment wall motion scoring<sup>23</sup>. HFpEF, is defined as signs and symptoms of HF with  
53  
54  
55  
56  
57  
58  
59  
60



1  
2  
3 LVEF $\geq$ 50% and raised natriuretic peptides (BNP>35pg/ml or NT-proBNP>125pg/ml) along with one  
4  
5 other criteria: i) structural heart disease (left atrial enlargement or left ventricular hypertrophy) on  
6  
7 TTE, ii) evidence of LV diastolic dysfunction based on ESC Guidelines 2016, or iii) hospitalization with  
8  
9 heart failure within 12 months prior to study entry.  
10

11  
12 Hypertension is defined in this study as a documented resting clinic systolic blood pressure (SBP)  
13  
14  $\geq$ 140 mmHg or Diastolic Blood Pressure (DBP)  $\geq$ 90mmHg. Diabetes mellitus will be defined according  
15  
16 to the World Health Organization (WHO) criteria.<sup>24</sup>  
17  
18  
19  
20  
21  
22

### 23 **Study Setting**

24  
25 The study will be conducted at two sites: the cardiology research department at University Hospitals  
26  
27 Coventry & Warwickshire (UHCW) NHS Trust and at the cardiac rehabilitation facility of the hospital.  
28  
29 The study assessments are expected to be undertaken during a single visit, however a second visit  
30  
31 will be arranged if all the assessments are not completed.  
32  
33  
34  
35  
36  
37

### 38 **Study Population**

39  
40 Patients will be matched according to age, gender, Body Mass Index (BMI) and allocated to 5  
41  
42 different groups. All patients will be aged 70 years or above.  
43  
44

45 The first four groups will constitute: group A) normal healthy volunteers without major  
46  
47 comorbidities including hypertension and diabetes, group B) patients with hypertension without  
48  
49 diabetes mellitus, group C) patients with hypertension AND diabetes mellitus, and group D) patients  
50  
51 with HFpEF. The fifth, parallel group E will comprise the HFrEF group. In order to make meaningful  
52  
53 comparison between the groups 21 patients each are planned to be recruited in groups A to D and  
54  
55 11 in group E determined by sample size calculation.  
56  
57  
58  
59  
60

## Aims

We plan to assess vascular function, and cardiovascular performance in different cohorts (figure 2). Arterial resistance measured by pulse wave velocity (PWV) will be the primary outcome measure and will be compared between groups A to D. A separate comparison will be made between groups D and E. We intend to investigate if there is increasing arterial resistance from group "A" to group "D" and if there is a significant difference in arterial resistance between groups "D" and "E. The secondary measures will focus on endothelial function (Laser Doppler measurements) and other cardiovascular performance measures; peak VO<sub>2</sub> by Cardio-Pulmonary Exercise Test (CPEX), and 6-minute walk distance. Bloods samples will be taken for NT-proBNP, high sensitivity Troponin T and serum will be stored for testing later for vascular biomarkers and galectin-3.

## Inclusion Criteria

- Group A: healthy males or females aged  $\geq 70$  years without major systemic illnesses including hypertension and diabetes mellitus.
- Group B: males or females aged  $\geq 70$  years with hypertension only.
- Group C: males or females aged  $\geq 70$  years with hypertension and diabetes mellitus but without HF.
- Group D: males or females aged  $\geq 70$  years with HFpEF.
- Group E: males or females aged  $\geq 70$  years with HFrEF.

**Exclusion criteria**

- Acute coronary syndrome (including MI), cardiac surgery, other major CV surgery within 3 months, or urgent percutaneous coronary intervention (PCI) within 30 days of entry.
- Patients who have had an MI, coronary artery bypass graft (CABG) or other event within the 6 months prior to entry unless an echo measurement performed after the event confirms a LVEF  $\geq$ 50%.
- Current acute decompensated HF requiring intravenous therapy
- Alternative reason for shortness of breath such as: significant pulmonary disease or severe COPD, haemoglobin (Hb)  $<$ 10 g/dl, or body mass index (BMI)  $>$  40 kg/m<sup>2</sup>.
- Severe left-sided valvular heart disease
- Hypotension (systolic BP  $<$ 100 mm Hg).
- Severe Liver failure
- Primary pulmonary hypertension
- Bedbound/immobile patients
- Chronic renal failure with creatinine of  $>$ 250  $\mu$ mol/l
- Significant Peripheral Vascular Disease (PVD), defined as having signs of absent peripheral pulses or reported claudication pain or documented history of PVD

### Sample size calculation and statistical analysis

The sample size calculation is based on estimates obtained in studies reported by Balmain et al<sup>25</sup> and Marechaux et al.<sup>26</sup> The aim is to detect a difference in the primary outcome; Pulse Wave Velocity (PWV), between the five groups of patients recruited to the study with the significance level being set at 5% if the p value is less than 0.05. The estimates range from a mean PWV of 8.6 m/s for the control group to 11.3 m/s for the HFpEF group and the within group standard deviation is assumed to be SD=1.7 m/s and equal for each group. No estimate of the mean PWV was available in the literature for the hypertension and Diabetes Mellitus group, so this value was assumed to be in exactly in the middle of the hypertension and HFpEF mean. A sample size of n=11 for HFpEF patients and n=21 for all other groups will allow to detect a difference in PWV between the five groups for the aforementioned configuration of means and SD with 80% power using the overall F-test in a one-way ANOVA. The study would additionally be sufficiently powered for the pair-wise comparison of the control group with the hypertension group and the control group with the HFpEF group. Statistical analysis will be performed with IBM SPSS Statistics for Windows, version 22.0. Descriptive statistics will be given as number (percentage), as average ( $\pm$ SD) or median (interquartile range).

## Study Procedures

Participants will attend our Research Unit in the morning. To avoid confounding factors for vascular measurements, participants will be asked to abstain from caffeine and tobacco for 12 hours, and to omit their morning blood pressure medication. Vascular function studies will be carried out in a quiet, temperature-controlled (21–23 °C) room with subjects in the supine position, following at least 10 min of rest. Arterial compliance will be assessed using applanation tonometry to measure aortic PWV. Cutaneous microvascular function will be assessed by Laser Doppler Flowmetry, after which the blood test and TTE measurements will be performed. Subsequently, patients will be asked to undertake the 6-MWT and CPEX test (figure 2).

## Screening and Recruitment

*Group A:* Participants will be recruited via the UHCW Hospital Radio, senior citizen's group in the community, and via friends and relatives of colleagues. These patients will receive an invitation letter and participant information sheet to read, they will then be contacted by the study coordinator at least 24 hours after receiving the invitation letter to answer any questions. If the participant is interested in taking part in the study, they will be invited for a screening visit at UHCW to confirm their eligibility. This will involve a full medical history, physical examination, blood

1  
2  
3 pressure measurement and blood tests (FBC, Glucose, HbA1c, and renal function). If the eligibility  
4 criteria are met, the study appointment will be organised.  
5  
6  
7  
8  
9

10 *Group B and C:* Patients will be approached and screened for eligibility at the hypertension and  
11 diabetes outpatient clinics at UHCW. Eligible participants will receive an invitation letter and  
12 participant information sheet. They will then be contacted by the study coordinator at least 24 hours  
13 later to answer any questions, and to organise a study appointment .  
14  
15  
16  
17  
18

19  
20  
21 *Group D and E:* Patients will be approached and screened for the eligibility criteria at the HF  
22 community clinic. Eligible participants will receive an invitation letter and participant information  
23 sheet. They will then be contacted by the study coordinator after at least 24 hours to answer any  
24 questions, and to organise a study appointment.  
25  
26  
27  
28  
29

### 30 31 32 33 **Study Assessments**

34  
35  
36 Participants in all groups will have the same assessments as follows (table 1):  
37

#### 38 *Blood pressure and heart rate measurement*

39  
40  
41 Heart rate and one brachial blood pressure measurement will be recorded over a 30s time period.  
42  
43 These measurements will be performed 3 times for each subject and averaged.  
44  
45

46  
47  
48  
49 *Blood tests* will include full blood count, renal function and electrolytes, liver function tests, NT-  
50 proBNP, and high-sensitive cardiac Troponin T (hs-cTnT). Blood samples will be frozen in the Tissue  
51 bank at UHCW for further tests such as vascular and other biomarkers e.g. galectin-3 to be  
52 performed at a later date.  
53  
54  
55  
56  
57  
58  
59  
60

1  
2  
3 *Urinalysis* will be performed from a mid-stream urine sample obtained for albumin and creatinine  
4  
5 levels. This will further be stored at the Tissue Bank UHCW to be analysed at a later date for  
6  
7 metabolite profiles (“metabolomics”), related to cardiovascular risk and insulin resistance.  
8  
9

10  
11  
12  
13 *Transthoracic echocardiography (TTE)* will include measurements of cardiac chamber sizes,  
14  
15 ventricular function including LVEF, indices of LV diastolic function, assessment of valvular heart  
16  
17 disease, tissue Doppler imaging and strain rate imaging.  
18  
19

20  
21  
22  
23 *Exercise tolerance* will be assessed by a 6-minute walk test and a CPEX in each patient. The CPEX  
24  
25 test will involve measurement of the oxygen consumption and carbon dioxide production and heart  
26  
27 rate and blood pressure monitoring whilst exercising on an exercise bike.  
28  
29

### 30 31 32 33 **Pulse wave velocity protocol**

34  
35 Arterial resistance will be assessed using pulse wave velocity. Aortic PWV will be evaluated using a  
36  
37 high fidelity micromanometer (SPC-301; Millar Instruments, Texas, USA) coupled with the  
38  
39 SphygmoCorTM system (SphygmoCor BPAS; PWV Medical, Sydney, Australia). A hand-held  
40  
41 micromanometer-tipped probe will be applied to the skin overlying the radial, femoral and carotid  
42  
43 arteries at the point of maximal arterial pulsation. Gated to a simultaneous electrocardiogram, the  
44  
45 pulse wave will be recorded at each point. This data, in combination with the measured body  
46  
47 surface distance between the two points, will be incorporated by the software program to calculate  
48  
49 PWV in meters per second (m/s). The measurements will be repeated 3 times and the average PWV  
50  
51 will be used for analysis.  
52  
53  
54  
55

### 56 57 58 59 **Laser Doppler Flowmetry (LDF) Protocol**

60

1  
2  
3 The forearm cutaneous blood flow will be measured at rest and during reactive hyperaemia by using  
4 Laser Doppler Flowmetry (LDF), in accordance to the Fizeau-Doppler principle<sup>27</sup>. Measurements of  
5 cutaneous blood flow will be expressed in perfusion units (PU) and the Laser Doppler signal will be  
6 continuously monitored on a computer (Moor instruments, VMS software V4.06) coupled with Moor  
7 instruments system (moorVMS-VASC). The thenar eminence will be used for the placement of the  
8 LDF probe (VP1T/7), consistently at the same place, before and post the occlusive reactive  
9 hyperaemia manoeuvre. The room temperature will be maintained at 22 degrees Celsius during  
10 forearm cutaneous blood flow measurements. The reactive hyperaemia will be produced by  
11 occluding the forearm blood flow with a pneumatic cuff inflated to a pressure of 50 mm Hg above  
12 the Systolic Blood Pressure for 3 minutes. The signal obtained during complete arterial occlusion will  
13 be taken as the biologic zero for cutaneous blood flow measurements before and during reactive  
14 hyperaemia. Resting flow will be taken as the average of a 6-minute stable LDF recording. The  
15 definition of the measurements taken are shown in figure 3 and the power spectral density (PSD)  
16 will be measured using the basic fast Fourier transform algorithm<sup>28</sup>

### 37 **Cardio-Pulmonary Exercise Test (CPEX)**

38  
39  
40 Exercise tolerance will be assessed by 6-minute walk test and CPEX, conducted in accordance with  
41 existing guidelines<sup>29 30</sup>. For the walk test, participants will walk as far as possible in six minutes along  
42 a flat, obstacle free corridor, turning 180 degrees every 30m. For CPEX, participants will pedal a cycle  
43 ergometer at 70 rpm until volitional fatigue, using a ramp protocol. Breath-by-breath measurement  
44 of O<sup>2</sup> consumption, CO<sup>2</sup> production and ventilation will be used to determine key cardiorespiratory  
45 parameters including peak O<sup>2</sup> uptake (VO<sup>2</sup> peak), VO<sup>2</sup> at the anaerobic threshold (VO<sup>2</sup> AT) and  
46 ventilatory efficiency (VE/VCO<sup>2</sup>). Blood pressure, ECG and O<sup>2</sup> saturation will be continuously  
47 monitored. Criteria for a peak test will include respiratory exchange ratio (RER) >1.10<sup>31</sup>.



## Blinding

In order to reduce observer-bias the operator involved in the assessments of the primary outcome (pulse wave velocity) will be blinded to the comorbidities of the group of patients (A to E).

## Primary Outcome

Our primary outcome will be a difference in arterial resistance between each of the five groups, as measured by aortic PWV. In addition, specific comparisons will be made between the control and hypertension groups as well as the control and HFpEF groups.

## Secondary Outcomes

The secondary outcomes are to assess and compare endothelial function and cardiovascular performance in all groups as measured by the following:

- **Blood tests:** NTproBNP, high sensitivity Troponin T, Galectin-3
- **Urinalysis:** Albumin, Creatinine and Metabolite profiles (“metabolomics”), related to cardiovascular risk and insulin resistance
- **Transthoracic echocardiography (TTE)** indices of LV diastolic function, tissue Doppler imaging, strain rate imaging and measuring flow with pulsed-wave Doppler echocardiography interrogating the LV outflow tract.
- **Exercise tolerance:** 6-minute walk test and a Cardiopulmonary Exercise Test (CPEX)

### **End of study definition**

The study will be closed at the last patient's study visit.

### **Study funding and sponsor**

The study has been funded by a research grant from the West Midlands Clinical Research Network, National Institute of Health Research, UK. The study is sponsored by the Research, Development & Innovation department of the University Hospitals Coventry & Warwickshire NHS Trust (RDI, UHCW), UK.

### **Study oversight**

The Study will be monitored and overseen by the Study Management Group and the Research, Development and Innovation Department at UHCW.

### **Ethical approval and research governance**

The study was approved by the regional research ethics committee (REC), West Midland and Black Country 17/WM/0039, UK and permission to conduct the study in the hospital was also obtained from the RDI, UHCW NHS Trust. The study will be conducted in compliance with the principles of the GCP guidelines and in accordance with all applicable regulatory guidance, including, but not limited to, the Research Governance Framework and the Health Research Authority, UK. Progress reports

1  
2  
3 and a final report at the conclusion of the study will be submitted to the approving REC within the  
4  
5 timelines defined by the committee.  
6  
7  
8  
9

### 10 **Public and Patient Involvement**

11  
12 Members of the public have been approached with feedback obtained regarding the Patient  
13  
14 Information Sheet and Invitation Letter. Following these recommendations adjustments of these  
15  
16 documents have been made. The results of the study, once published in a peer-reviewed journal,  
17  
18 will be disseminated amongst the study participants.  
19  
20  
21  
22

### 23 **Dissemination and impact**

24  
25  
26 The hypothesis on which this study is based has been published.**Error! Bookmark not defined.** The  
27  
28 results of the study will be presented at national and international conferences and released in  
29  
30 appropriate media outlets, including social media. The results are expected to be published in peer-  
31  
32 reviewed journals and presented in local, national and international medical scientific congresses  
33  
34 and meetings. The study is anticipated to shed light on whether vascular stiffness is an important  
35  
36 determinant of HFpEF which in turn could potentially encourage research for new therapeutic  
37  
38 targets.  
39  
40  
41  
42  
43  
44

### 45 **Competing interests**

46  
47  
48 None declared.  
49  
50  
51  
52

### 53 **Summary**

54  
55  
56 The IDENTIFY-HF study aims to highlight the effect of increasing comorbidities on arterial stiffness in  
57  
58 relation to the development of HFpEF, and to confirm the importance of arterial stiffness in its  
59  
60

pathophysiology. This understanding will hopefully promote further research, aiding the discovery of specific disease modifying treatment for this complex syndrome.

Table 1: Schedule of measures for every participant within the study.

GROUP A ONLY: SEPARATE SCREENING VISIT PRIOR TO THE STUDY VISIT TO CHECK THAT THE PARTICIPANTS MEET THE ELIGIBILITY CRITERIA. FULL MEDICAL HISTORY, PHYSICAL EXAMINATION, BLOOD PRESSURE AND BLOOD TESTS (FBC, GLUCOSE, HBA1C, AND RENAL FUNCTION).

| TIME OF DAY      | Procedures/Assessments*                                                                                                                                                                                                                                     |
|------------------|-------------------------------------------------------------------------------------------------------------------------------------------------------------------------------------------------------------------------------------------------------------|
| <b>MORNING</b>   | <b>Eligibility check</b>                                                                                                                                                                                                                                    |
|                  | <b>Informed consent</b>                                                                                                                                                                                                                                     |
|                  | <b>Demographic data</b> ( <i>DOB, sex, ethnicity, height and weight</i> )                                                                                                                                                                                   |
|                  | <b>Relevant clinical history</b>                                                                                                                                                                                                                            |
|                  | <b>Current medications</b>                                                                                                                                                                                                                                  |
|                  | <b>Blood pressure and Heart rate</b>                                                                                                                                                                                                                        |
|                  | <b>Pulse Wave velocity (PWV)</b> to measure arterial resistance                                                                                                                                                                                             |
|                  | <b>Laser Doppler</b> to measure microvascular function                                                                                                                                                                                                      |
|                  | <b>Blood tests:</b> Full blood count, renal function and electrolytes, liver function tests, NT-proBNP, high-sensitive cardiac Troponin T (hs-cTnT). Samples will be frozen and stored for future analysis of vascular and other biomarkers e.g. Galectin-3 |
|                  | <b>Urine test:</b> Albumin and Creatinine. Samples will be frozen and stored for future analysis of metabolite profiles                                                                                                                                     |
| <b>LUNCH</b>     |                                                                                                                                                                                                                                                             |
| <b>AFTERNOON</b> | <b>Transthoracic echocardiography (TTE):</b> tissue Doppler imaging and strain rate imaging                                                                                                                                                                 |
|                  | <b>6-minute walk test</b>                                                                                                                                                                                                                                   |

## Cardiopulmonary Exercise Test (CPEX)

All assessments will be aimed to be completed in a single visit. However, a possible second visit can be arranged either at Atrium Health or University Hospitals Coventry and Warwickshire NHS Trust for completion of all assessments, if require.

### Contributors

PB is the chief investigator for the study and DA leading on writing the protocol, ethics application and preparation of this manuscript. FC, MW, MM all contributed fully to study design. GM, NC, SM, SE contributed from their respective discipline and authored the relevant section of the protocol and manuscript. All authors read and approved the final version of the manuscript.

Review only

## References

<sup>1</sup> Cook C, Cole G, Asaria P, Jabbour R, Francis DP, The annual global economic burden of heart failure. *Int J Cardiol* (2014);171(3):368-76

<sup>2</sup> <https://www.nice.org.uk/guidance/cg108>

<sup>3</sup> Yancy CW, Lopatin M, Stevenson LW, De Marco T, Fonarow GC, Committee ASA, et al. Clinical presentation, management, and in-hospital outcomes of patients admitted with acute decompensated heart failure with preserved systolic function: a report from the Acute Decompensated Heart Failure National Registry (ADHERE) Database. *J Am Coll Cardiol*. 2006

<sup>4</sup> Chan MM, Lam CS. How do patients with heart failure with preserved ejection fraction die? *Eur J Heart Fail*. 2013; 15(6):604–13. [PubMed: 23610137]

<sup>5</sup> Massie BM, Carson PE, McMurray JJ, Komajda M, McKelvie R, Zile MR, et al. Irbesartan in patients with heart failure and preserved ejection fraction. *N Engl J Med*. 2008; 359(23):2456–67.

<sup>6</sup> Banerjee P. Heart failure with preserved ejection fraction. A clinical crisis. *Int J Cardiol*. 2016 Feb 1;204:198-9. doi: 10.1016/j.ijcard.2015.11.170. Epub 2015 Nov 24. PMID: 26670172.

<sup>7</sup> Zakeri R, Cowie MR. Heart failure with preserved ejection fraction: controversies, challenges and future directions *Heart* Published Online First: 05 January 2018. doi: 10.1136/heartjnl-2016-310790.

<sup>8</sup> Shah SJ, Kitzman DW, Borlaug BA, et al., Phenotype-Specific Treatment of Heart Failure With Preserved Ejection Fraction. A Multiorgan Roadmap, *Circulation*. 2016;134:73-90. DOI: 10.1161/CIRCULATIONAHA.116.021884

<sup>9</sup> Paulus WJ, Tschope C. A Novel Paradigm for Heart Failure with Preserved Ejection Fraction: Comorbidities Drive Myocardial Dysfunction and Remodeling Through Coronary Microvascular Endothelial Inflammation. *J Am Coll Cardiol*. 2013; 62:263–71

<sup>10</sup> Marechaux S, Vascular and Microvascular Endothelial Function in Heart Failure With Preserved Ejection Fraction, *Journal of Cardiac Failure* Vol. 22 No. 1 2016

<sup>11</sup> McMurray JJ, Adamopoulos S, Anker SD, et al., ESC Guidelines for the diagnosis and treatment of acute and chronic heart failure 2012: The Task Force for the Diagnosis and Treatment of Acute and Chronic Heart Failure 2012 of the European Society of Cardiology. Developed in collaboration with the Heart Failure Association (HFA) of the ESC. *Eur Heart J* 2012;33:1787–1847.

1  
2  
3  
4  
5  
6  
7  
8  
9  
10  
11  
12  
13  
14  
15  
16  
17  
18  
19  
20  
21  
22  
23  
24  
25  
26  
27  
28  
29  
30  
31  
32  
33  
34  
35  
36  
37  
38  
39  
40  
41  
42  
43  
44  
45  
46  
47  
48  
49  
50  
51  
52  
53  
54  
55  
56  
57  
58  
59  
60

---

<sup>14</sup> Borbely A, van der Velden J, Papp Z, Bronzwaer JG, Edes I, Stienen GJ, Paulus WJ. Cardiomyocyte stiffness in diastolic heart failure. *Circulation* 2005; 111:774–781

<sup>15</sup> Balmain S, Differences in arterial compliance, microvascular function and venous capacitance between patients with heart failure and either preserved or reduced left ventricular systolic function, *European Journal of Heart Failure* 9 (2007) 865–871

<sup>16</sup> Marechaux S, Vascular and Microvascular Endothelial Function in Heart Failure With Preserved Ejection Fraction, *Journal of Cardiac Failure* Vol. 22 No. 1 2016

<sup>17</sup> Jamil Mayet, Alun Hughes. Cardiac and vascular pathophysiology in hypertension. *Heart*. 2003 September; 89(9): 1104–1109.

<sup>18</sup> Stehouwer C.D., Henry R.M., Ferreira I. Arterial stiffness in diabetes and the metabolic syndrome: A pathway to cardiovascular disease. *Diabetologia*. 2008;51:527–539. doi: 10.1007/s00125-007-0918-3.

<sup>19</sup> M. C. Wang, W. C. Tsai, J. Y. Chen, M. F. Cheng, and J. J. Huang, “Arterial stiffness correlated with cardiac remodelling in patients with chronic kidney disease,” *Nephrology*, vol. 12, no. 6, pp. 591–597, 2007.

<sup>20</sup> AlGhatrif M, Strait JB, Morrell CH, Canepa M, Wright J, Elango P, Scuteri A, Najjar SS, Ferrucci L, Lakatta EG. Longitudinal trajectories of arterial stiffness and the role of blood pressure: the Baltimore Longitudinal Study of Aging. *Hypertension*. 2013;62:934–941

<sup>21</sup> Banerjee P. Heart failure: a story of damage, fatigue and injury? *Open Heart* 2017; 4:e000684. doi: 10.1136/openhrt-2017-000684

<sup>21</sup> Remes J, Miettinen H, Reunanen A, Pyorala K. Validity of clinical diagnosis of heart failure in primary health care. *Eur Heart J* 1991;12(3): 315–21.

<sup>21</sup> Schiller NB, Shah PM, Crawford M, et al. Recommendations for quantitation of the left ventricle by two-dimensional echocardiography. American Society of Echocardiography Committee on Standards, Subcommittee on Quantitation of Two-Dimensional Echocardiograms. *J Am Soc Echocardiogr* 1989;2(5):358–67.

<sup>21</sup> [www.diabetes.org.uk](http://www.diabetes.org.uk)

<sup>21</sup> Balmain S, Differences in arterial compliance, microvascular function and venous capacitance between patients with heart failure and either preserved or reduced left ventricular systolic function, *European Journal of Heart Failure* 9 (2007) 865–871

<sup>21</sup> Marechaux S, Vascular and Microvascular Endothelial Function in Heart Failure With Preserved Ejection Fraction, *Journal of Cardiac Failure* Vol. 22 No. 1 2016

<sup>21</sup> Roustit M, Cracowski JL. Non-invasive assessment of skin microvascular function in humans: an insight into methods. *Microcirculation* 2011; 19:47e64.

---

1  
2  
3  
4  
5  
6  
7  
8  
9  
10  
11  
12  
13  
14  
15  
16  
17  
18  
19  
20  
21  
22  
23  
24  
25  
26  
27  
28  
29  
30  
31  
32  
33  
34  
35  
36  
37  
38  
39  
40  
41  
42  
43  
44  
45  
46  
47  
48  
49  
50  
51  
52  
53  
54  
55  
56  
57  
58  
59  
60

<sup>21</sup> Marechaux S, Vascular and Microvascular Endothelial Function in Heart Failure With Preserved Ejection Fraction, *Journal of Cardiac Failure* Vol. 22 No. 1 2016

<sup>21</sup> Holland, A.E., et al., An official European Respiratory Society/American Thoracic Society technical standard: field walking tests in chronic respiratory disease. *Eur Respir J*, 2014. 44(6): p. 1428-46.

<sup>22</sup> Remes J, Miettinen H, Reunanen A, Pyorala K. Validity of clinical diagnosis of heart failure in primary health care. *Eur Heart J* 1991;12(3): 315–21.

<sup>23</sup> Schiller NB, Shah PM, Crawford M, et al. Recommendations for quantitation of the left ventricle by two-dimensional echocardiography. American Society of Echocardiography Committee on Standards, Subcommittee on Quantitation of Two-Dimensional Echocardiograms. *J Am Soc Echocardiogr* 1989;2(5):358–67.

<sup>24</sup> [www.diabetes.org.uk](http://www.diabetes.org.uk)

<sup>25</sup> Balmain S, Differences in arterial compliance, microvascular function and venous capacitance between patients with heart failure and either preserved or reduced left ventricular systolic function, *European Journal of Heart Failure* 9 (2007) 865–871

<sup>26</sup> Marechaux S, Vascular and Microvascular Endothelial Function in Heart Failure With Preserved Ejection Fraction, *Journal of Cardiac Failure* Vol. 22 No. 1 2016

<sup>27</sup> Roustit M, Cracowski JL. Non-invasive assessment of skin microvascular function in humans: an insight into methods. *Microcirculation* 2011; 19:47e64.

<sup>28</sup> Marechaux S, Vascular and Microvascular Endothelial Function in Heart Failure With Preserved Ejection Fraction, *Journal of Cardiac Failure* Vol. 22 No. 1 2016

<sup>29</sup> Holland, A.E., et al., An official European Respiratory Society/American Thoracic Society technical standard: field walking tests in chronic respiratory disease. *Eur Respir J*, 2014. 44(6): p. 1428-46.

<sup>30</sup> Ross, R.M., ATS/ACCP statement on cardiopulmonary exercise testing. *Am J Respir Crit Care Med*, 2003. 167(10): p. 1451; author reply 1451.

<sup>31</sup> Balady, G.J., et al., Clinician's Guide to cardiopulmonary exercise testing in adults: a scientific statement from the American Heart Association. *Circulation*, 2010. 122(2): p. 191-225.



1  
2  
3  
4  
5  
6  
7  
8  
9  
10  
11  
12  
13  
14  
15  
16  
17  
18  
19  
20  
21  
22  
23  
24  
25  
26  
27  
28  
29  
30  
31  
32  
33  
34  
35  
36  
37  
38  
39  
40  
41  
42  
43  
44  
45  
46  
47  
48  
49  
50  
51  
52  
53  
54  
55  
56  
57  
58  
59  
60

Figure 1: Overview of the hypothesis behind the IDENTIFY-HF study

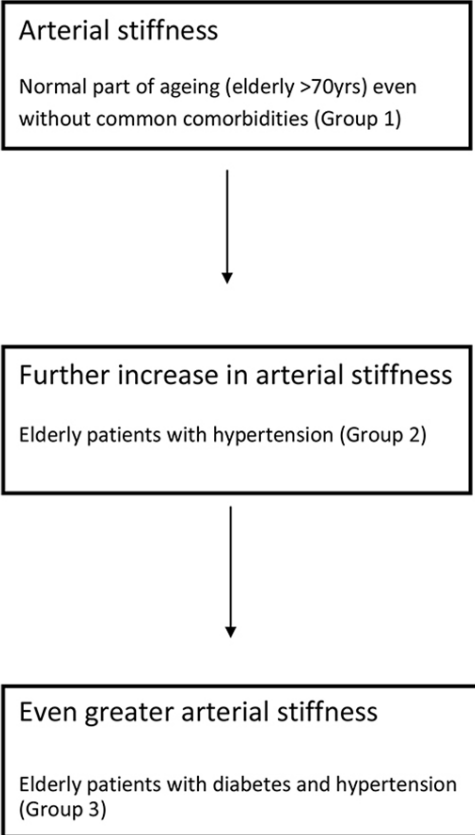

Figure 1: Overview of the hypothesis behind the IDENTIFY-HF study

90x90mm (300 x 300 DPI)

Figure 2: Study Flow Chart

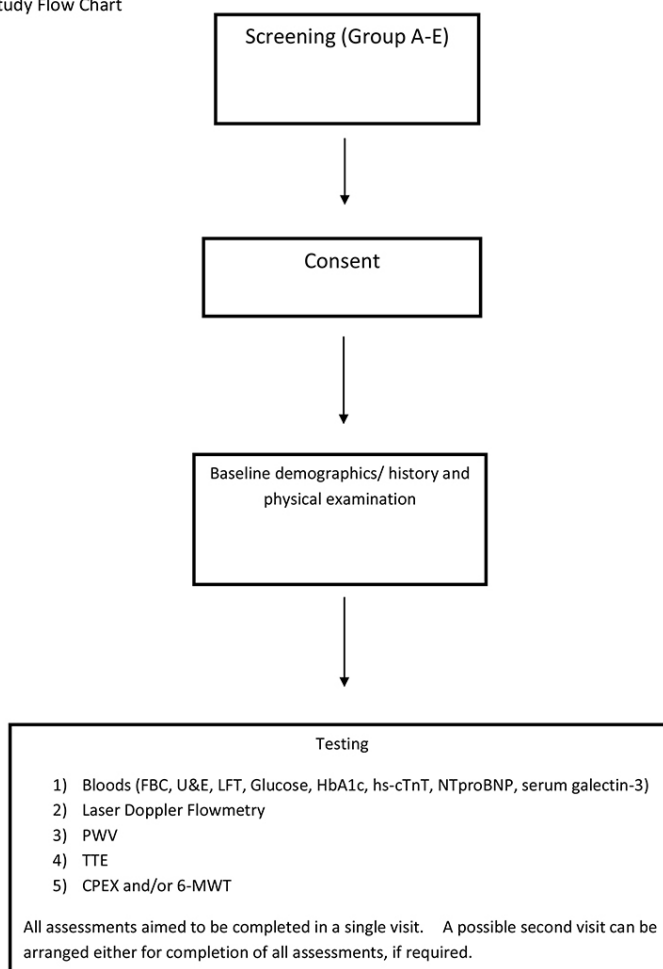

Figure 2: Study Flow Chart

90x90mm (300 x 300 DPI)

Figure 3: Laser Doppler Flowmetry for assessment of endothelial function. Schematic representation of flow (perfusion units) as a function of time in rest, after arterial occlusion and after cuff release. (adapted with permission of Moor Diagnostics)

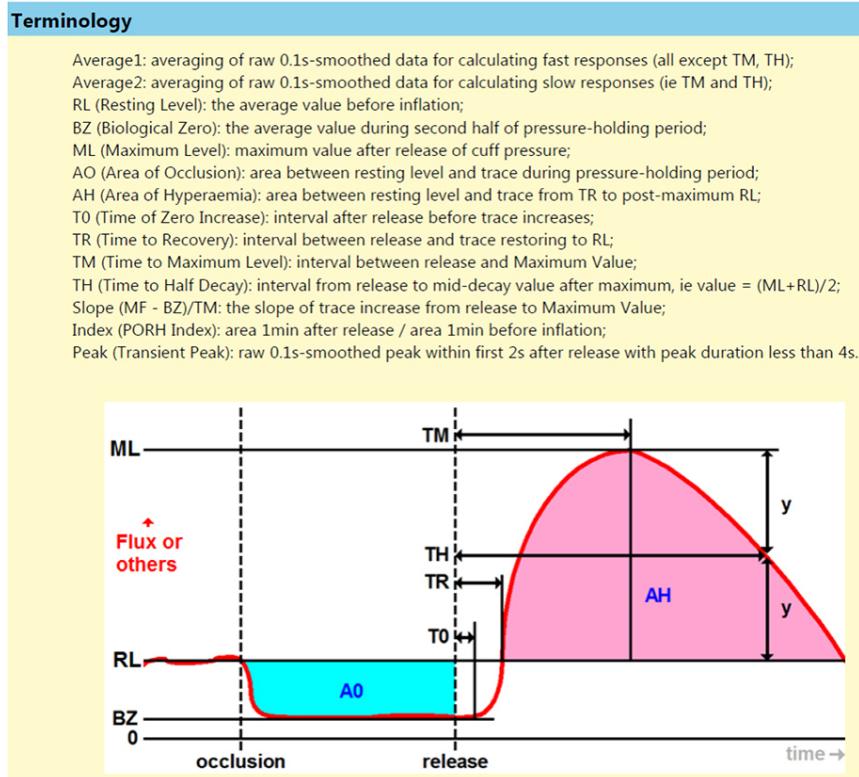

Figure 3

90x90mm (300 x 300 DPI)

# BMJ Open

## The Heart Failure with Preserved Ejection Fraction (HFpEF) Pathophysiology, observational Study (IDENTIFY-HF): does increased arterial stiffness associate with HFpEF, in addition to ageing and vascular effects of co-morbidities? - rationale and design.

|                                 |                                                                                                                                                                                                                                                                                                                                                                                                                                                                                                                                                                                                                                                                                                                                                                                                                                                                                                                                                                                                                                                                                                                                                                     |
|---------------------------------|---------------------------------------------------------------------------------------------------------------------------------------------------------------------------------------------------------------------------------------------------------------------------------------------------------------------------------------------------------------------------------------------------------------------------------------------------------------------------------------------------------------------------------------------------------------------------------------------------------------------------------------------------------------------------------------------------------------------------------------------------------------------------------------------------------------------------------------------------------------------------------------------------------------------------------------------------------------------------------------------------------------------------------------------------------------------------------------------------------------------------------------------------------------------|
| Journal:                        | <i>BMJ Open</i>                                                                                                                                                                                                                                                                                                                                                                                                                                                                                                                                                                                                                                                                                                                                                                                                                                                                                                                                                                                                                                                                                                                                                     |
| Manuscript ID                   | bmjopen-2018-027984.R1                                                                                                                                                                                                                                                                                                                                                                                                                                                                                                                                                                                                                                                                                                                                                                                                                                                                                                                                                                                                                                                                                                                                              |
| Article Type:                   | Protocol                                                                                                                                                                                                                                                                                                                                                                                                                                                                                                                                                                                                                                                                                                                                                                                                                                                                                                                                                                                                                                                                                                                                                            |
| Date Submitted by the Author:   | 20-Aug-2019                                                                                                                                                                                                                                                                                                                                                                                                                                                                                                                                                                                                                                                                                                                                                                                                                                                                                                                                                                                                                                                                                                                                                         |
| Complete List of Authors:       | Ali, Danish; University Hospital Coventry, ; University of Warwick Warwick Medical School, Callan, Nualla; (a) University Hospitals Coventry and Warwickshire NHS Trust<br>Ennis, Stuart; University Hospitals Coventry and Warwickshire NHS Trust, Cardiac Rehabilitation; Cardiff Metropolitan University, Cardiff Centre for Exercise & Health<br>Powell, Richard; University Hospitals Coventry and Warwickshire NHS Trust, Department of Cardiac Rehabilitation<br>McGuire, Scott; Department of Cardiac Rehabilitation, Centre for Exercise and Health, University Hospital, Coventry, UK<br>McGregor, Gordon; University Hospitals Coventry and Warwickshire NHS Trust, Cardiac Rehabilitation<br>Weickert, Martin; University Hospitals Coventry & Warwickshire NHS Trust, ; University of Warwick Warwick Medical School, Division of Translational and Systems Medicine<br>Miller, Michelle; University of Warwick, Warwick Medical School<br>Cappuccio, Francesco; University of Warwick, Warwick Medical School, Division of Health Sciences<br>Banerjee, Prithwish; University Hospitals Coventry and Warwickshire NHS Trust, Department of Cardiology |
| <b>Primary Subject Heading</b>: | Cardiovascular medicine                                                                                                                                                                                                                                                                                                                                                                                                                                                                                                                                                                                                                                                                                                                                                                                                                                                                                                                                                                                                                                                                                                                                             |
| Secondary Subject Heading:      | Geriatric medicine                                                                                                                                                                                                                                                                                                                                                                                                                                                                                                                                                                                                                                                                                                                                                                                                                                                                                                                                                                                                                                                                                                                                                  |
| Keywords:                       | Heart Failure with Preserved Ejection Fraction, Comorbidities, Pathophysiology, Arterial stiffness                                                                                                                                                                                                                                                                                                                                                                                                                                                                                                                                                                                                                                                                                                                                                                                                                                                                                                                                                                                                                                                                  |
|                                 |                                                                                                                                                                                                                                                                                                                                                                                                                                                                                                                                                                                                                                                                                                                                                                                                                                                                                                                                                                                                                                                                                                                                                                     |

SCHOLARONE™  
Manuscripts

1  
2  
3  
4  
5  
6  
7  
8  
9  
10  
11  
12  
13  
14  
15  
16  
17  
18  
19  
20  
21  
22  
23  
24  
25  
26  
27  
28  
29  
30  
31  
32  
33  
34  
35  
36  
37  
38  
39  
40  
41  
42  
43  
44  
45  
46  
47  
48  
49  
50  
51  
52  
53  
54  
55  
56  
57  
58  
59  
60

1  
2  
3  
4  
5  
6  
7  
8  
9  
10  
11  
12  
13  
14  
15  
16  
17  
18  
19  
20  
21  
22  
23  
24  
25  
26  
27  
28  
29  
30  
31  
32  
33  
34  
35  
36  
37  
38  
39  
40  
41  
42  
43  
44  
45  
46  
47  
48  
49  
50  
51  
52  
53  
54  
55  
56  
57  
58  
59  
60

# The Heart Failure with Preserved Ejection Fraction (HFpEF) Pathophysiology, observational Study (IDENTIFY-HF): does increased arterial stiffness associate with HFpEF, in addition to ageing and vascular effects of co-morbidities? - rationale and design

D. Ali (a,b), N. Callan (a), S. Ennis (c), R. Powell (c), S. McGuire (c,e), G. McGregor (c,e), M.O. Weickert (a,b,d,e), M.A. Miller (b), F.P. Cappuccio (a,b), P. Banerjee (a,b,e)

- (a) University Hospitals Coventry and Warwickshire NHS Trust, Coventry, UK
- (b) University of Warwick, Warwick Medical School, Coventry, UK
- (c) Department of Cardiac Rehabilitation, Centre for Exercise and Health, University Hospital, Coventry, UK
- (d) The ARDEN NET Centre, European Neuroendocrine Tumour Society (ENETS) Centre of Excellence (CoE), University Hospitals Coventry and Warwickshire NHS Trust, Coventry, UK
- (e) Health and Life Sciences Faculty Research Centre, Coventry University, Coventry, UK

**Keywords:** Heart Failure with Preserved Ejection Fraction, Comorbidities, Pathophysiology, Arterial stiffness

ClinicalTrials.gov Identifier: NCT03186833

Corresponding author:  
Prof Prithwish Banerjee  
Prithwish.banerjee@uhcw.nhs.uk

## Abstract

### Aims

There has been a paradigm shift proposing that comorbidities are a major contributor towards the heart failure with preserved ejection fraction (HFpEF) syndrome. Furthermore, HFpEF patients have abnormal macro and microvascular function, which may significantly contribute towards altered ventriculo-vascular coupling in these patients. The IDENTIFY-HF study will investigate whether gradually increased arterial stiffness (in addition to ageing) as a result of increasing common comorbidities, such as hypertension and diabetes, is associated with HFpEF.

### Methods and analysis:

In our observational study arterial compliance and microvascular function will be assessed in five groups (Groups A to E) of age, sex and BMI matched subjects (age  $\geq$  70 years in all groups):

Group A; normal healthy volunteers without major comorbidities such as hypertension and diabetes mellitus (control). Group B; patients with hypertension without diabetes mellitus or heart failure (HF). Group C; patients with hypertension and diabetes mellitus without HF. Group D, patients with HFpEF; Group E; patients with heart failure and reduced ejection fraction (HFrEF) (parallel group).

Vascular function and arterial compliance will be assessed using Pulse Wave Velocity, as the primary outcome measure. Further outcome measures include Cutaneous Laser Doppler Flowmetry as a measure of endothelial function, transthoracic echocardiography and exercise tolerance measures.

Biomarkers include NT-proBNP, high sensitivity Troponin T, as well as serum galactin-3 as a marker of fibroses.

## Ethics and dissemination

The study was approved by the regional research ethics committee (REC), West Midland and Black Country 17/WM/0039, UK and permission to conduct the study in the hospital was also obtained from the RDI, UHCW NHS Trust. The results will be published in peer-reviewed journals and presented in local, national and international medical society meetings.

## Strengths and limitations of this study

- An important observational study aimed towards the understanding of the complex pathophysiology of HFpEF.
- Will provide insight whether the HFpEF syndrome is associated with increased arterial stiffness, as a result of increasing comorbidities.
- Comprehensive study of patients with increasing comorbidities investigating macrovascular/microvascular function, echocardiographic, biochemical and metabolomics to assess endothelial function in age, sex, and BMI-matched groups.
- The limitations of the study is that groups with more comorbidities (e.g. diabetes mellitus, hypertension and chronic kidney disease) should be included to fully investigate the potential effect of increasing comorbidities on arterial stiffness, which in turn, is associated with HFpEF. Further, the cross-sectional design of the study with the related disadvantages



## INTRODUCTION

Heart failure (HF) is a major growing public health concern with approximately 20 million patients affected globally, posing a significant health economic burden, with an estimated cost of \$108 billion per year worldwide.<sup>1</sup> In the UK alone, approximately 5% of all emergency medical admissions are due to heart failure with an approximate cost to the National Health Service of £1.9 billion per year.<sup>2</sup> Heart failure with preserved ejection fraction (HFpEF) is reported to comprise about 50% of the total heart failure burden and continues to have a high and unchanged mortality over many years, a poor quality of life and similar readmission rates to HFREF.<sup>3 4</sup> The prognosis of HFpEF is comparable to systolic heart failure (SHF), now referred to as heart failure with reduced ejection fraction (HFrEF), with an estimated 5-year mortality of around 50%. This is worrying as no treatments that influence outcome in HFpEF have so far been found.<sup>5</sup> Most large-scale pharmacological phase III clinical trials have been unsuccessful.<sup>6 7</sup> Whilst there is no single reason contributing to the negative result of these trials, the most likely explanation is that our understanding of the pathophysiology of the HFpEF syndrome remains incomplete and we are, therefore, currently unable to produce therapies targeted at the underlying mechanisms causing the syndrome.<sup>8</sup> Therefore, in order to develop evidence-based treatments in patients with HFpEF, the underlying diverse pathophysiology requires further investigation.

Recently, there has been a shift in paradigm whereby comorbidities are thought to contribute significantly to HFpEF syndrome.<sup>9</sup> Furthermore, current evidence strongly suggests that HFpEF patients have abnormal macro-and microvascular function with abnormal ventricular-vascular coupling.<sup>10</sup> However, the effect of comorbidities on arterial stiffness and the HFpEF syndrome remains incompletely understood.

This study aims to investigate the pathophysiological process of HFpEF and this understanding will promote further research, aiding the development of new evidence-based interventions and/or early prevention strategies.

## Hypothesis

HFpEF is a complex syndrome which is characterized by signs and symptoms of heart failure and a normal or a close to normal ejection fraction, evidence of left ventricular diastolic dysfunction, structural heart disease, altered left ventricular filling (LV) and raised brain natriuretic peptide (BNP)<sup>11</sup>. The complete pathophysiology is not known, however it is widely accepted that it is associated with cardiac and non-cardiac comorbidities<sup>12</sup>. Cardiac abnormalities include altered atrial function, subtle alterations in LV systolic function and/or chronotropic incompetence.<sup>13</sup> Non-cardiac comorbidities, for example hypertension, diabetes mellitus, anaemia, pulmonary or renal diseases and obesity may contribute to the HFpEF syndrome. In terms of pathophysiology, diastolic dysfunction is a prominent feature of HFpEF patients to which many factors contribute including both myocardial and vascular stiffening<sup>14</sup>.

HFpEF patients are known to have altered vascular function. Balmain et al. investigated the comparison in arterial compliance, venous capacitance and microvascular vasodilator function in 3 patients' groups with HFpEF, HFrEF and normal volunteers (non-HF). All the groups had coronary artery disease (CAD)<sup>15</sup>. They found that there was reduced vascular compliance (increased arterial stiffness, decreased venous capacitance) in the HFpEF group compared to the HFrEF and non-HF groups. More recently, macro-and microvascular function was compared between HFpEF and hypertensive patients.<sup>16</sup> This study found that there was decreased microvascular function with increase in arterial stiffness and depressed endothelial function in the forearm vasculature in the HFpEF group compared the hypertensive group. These studies highlight the fact that abnormal vasculature is present and may be an important contributor to the HFpEF syndrome. Although the

1  
2  
3 groups in the above-mentioned studies were matched for age and sex, what remains unclear is why  
4  
5 certain patients of the same age and sex suffer from HFpEF whilst others do not. There is good  
6  
7 evidence that hypertension<sup>17</sup>, diabetes mellitus<sup>18</sup>, and chronic kidney disease<sup>19</sup> all increase vascular  
8  
9 resistance on their own. Aging itself is known to be an independent risk factor for arterial stiffness  
10  
11 and increase in pulse wave velocity.<sup>20 21</sup> It is therefore reasonable to consider that HFpEF may not be  
12  
13 due to a primary cardiac pathology but rather an end-result of non-cardiac comorbidities affecting  
14  
15 vascular function and resistance with perhaps some secondary cardiac involvement. We  
16  
17 hypothesized therefore, that arterial stiffness increases with comorbidities, on top of effects of  
18  
19 normal ageing (as illustrated in Figure 1), contributing towards the HFpEF syndrome. It is possible  
20  
21 that a gradual increase in arterial stiffness may be causing early fatigue of the cardiac muscles (as it  
22  
23 struggles to pump into an ever-increasing high-pressure vascular circuit) resulting in elevation of left  
24  
25 ventricular end diastolic pressure and subsequently HFpEF<sup>22</sup>.  
26  
27  
28  
29  
30  
31  
32  
33  
34  
35  
36  
37

## 38 **METHODS**

### 39 **Study Design**

40  
41 Single-centre, observational study in 5 age, sex and BMI matched groups varying for the presence or  
42  
43 absence of diabetes, hypertension or heart failure.  
44  
45  
46  
47  
48  
49  
50  
51  
52  
53

### 54 **Definitions**

55  
56 Heart failure in our study is defined as: a) relevant symptoms/signs/radiographic findings as  
57  
58 indicated by Boston criteria <sup>23</sup> and b) need for diuretic therapy. Preserved LV systolic function is  
59  
60

1  
2  
3 defined as a LV ejection fraction (LVEF) of  $\geq 50\%$ , measured by echocardiography. Impaired LV  
4  
5 systolic function will be defined as a LVEF of  $< 40\%$  in accordance with the European Society of  
6  
7 Cardiology guidelines on heart failure. LVEF will be calculated using semi- quantitative assessment  
8  
9 with 16 segment wall motion scoring<sup>24</sup>. HFpEF, is defined as signs and symptoms of HF with  
10  
11 LVEF  $\geq 50\%$  and raised natriuretic peptides (BNP  $> 35\text{pg/ml}$  or NT-proBNP  $> 125\text{pg/ml}$ ) along with one  
12  
13 other criteria: i) structural heart disease (left atrial enlargement or left ventricular hypertrophy) on  
14  
15 TTE, ii) evidence of LV diastolic dysfunction based on ESC Guidelines 2016, or iii) hospitalization with  
16  
17 heart failure within 12 months prior to study entry.  
18  
19

20  
21 Hypertension is defined in this study as a documented resting clinic systolic blood pressure (SBP)  
22  
23  $\geq 140$  mmHg or Diastolic Blood Pressure (DBP)  $\geq 90$  mmHg. Diabetes mellitus will be defined according  
24  
25 to the World Health Organization (WHO) criteria.<sup>25</sup>  
26  
27  
28  
29  
30

### 31 **Study Setting**

32  
33  
34 The study will be conducted at two sites: the cardiology research department at University Hospitals  
35  
36 Coventry & Warwickshire (UHCW) NHS Trust and at the cardiac rehabilitation facility of the hospital.  
37  
38 The study assessments are expected to be undertaken during a single visit, however a second visit  
39  
40 will be arranged if all the assessments are not completed.  
41  
42  
43  
44  
45

### 46 **Study Population**

47  
48  
49 Patients will be matched according to age, gender, Body Mass Index (BMI) and allocated to 5  
50  
51 different groups. All patients will be aged 70 years or above.  
52  
53

54 The first four groups will constitute: group A) normal healthy volunteers without major  
55  
56 comorbidities including hypertension and diabetes, group B) patients with hypertension without  
57  
58 diabetes mellitus, group C) patients with hypertension AND diabetes mellitus, and group D) patients  
59  
60

1  
2  
3 with HFpEF. The fifth, parallel group E will comprise the HFrEF group. In order to make meaningful  
4 comparison between the groups 21 patients each are planned to be recruited in groups A to D and  
5  
6  
7 11 in group E determined by sample size calculation.  
8  
9  
10  
11  
12  
13  
14  
15

## 16 **Aims**

17  
18 We plan to assess vascular function, and cardiovascular performance in different cohorts (figure 2).  
19  
20 Arterial resistance measured by pulse wave velocity (PWV) will be the primary outcome measure  
21 and will be compared between groups A to D. A separate comparison will be made between groups  
22  
23 D and E. We intend to investigate if there is increased arterial resistance from group "A" to group  
24  
25 "D" and if there is a significant difference in arterial resistance between groups "D" and "E. The  
26  
27 secondary measures will focus on endothelial function (Laser Doppler measurements) and other  
28  
29 cardiovascular performance measures; peak VO<sub>2</sub> by Cardio-Pulmonary Exercise Test (CPEX), and 6-  
30  
31 minute walk distance. Bloods samples will be taken for NT-proBNP, high sensitivity Troponin T and  
32  
33 serum will be stored for testing later for vascular biomarkers and galectin-3.  
34  
35  
36  
37  
38  
39  
40  
41  
42

## 43 **Inclusion Criteria**

- 44  
45 ● Group A: healthy males or females aged  $\geq 70$  years without major systemic illnesses including  
46  
47 hypertension and diabetes mellitus.  
48  
49 ● Group B: males or females aged  $\geq 70$  years with hypertension only.  
50  
51 ● Group C: males or females aged  $\geq 70$  years with hypertension and diabetes mellitus but without  
52  
53 HF.  
54  
55 ● Group D: males or females aged  $\geq 70$  years with HFpEF.  
56  
57 ● Group E: males or females aged  $\geq 70$  years with HFrEF.  
58  
59  
60

### Exclusion criteria

- Acute coronary syndrome (including MI), cardiac surgery, other major CV surgery within 3 months, or urgent percutaneous coronary intervention (PCI) within 30 days of entry.
- Patients who have had an MI, coronary artery bypass graft (CABG) or other event within the 6 months prior to entry unless an echo measurement performed after the event confirms a LVEF  $\geq 50\%$ .
- Current acute decompensated HF requiring intravenous therapy
- Alternative reason for shortness of breath such as: significant pulmonary disease or severe COPD, haemoglobin (Hb)  $< 10$  g/dl, or body mass index (BMI)  $> 40$  kg/m<sup>2</sup>.
- Severe left-sided valvular heart disease
- Hypotension (systolic BP  $< 100$  mm Hg).
- Severe Liver failure
- Primary pulmonary hypertension
- Bedbound/immobile patients
- Chronic renal failure with creatinine of  $> 250$   $\mu\text{mol/l}$
- Significant Peripheral Vascular Disease (PVD), defined as having signs of absent peripheral pulses or reported claudication pain or documented history of PVD

### Sample size calculation and statistical analysis

The sample size calculation is based on estimates obtained in studies reported by Balmain et al<sup>26</sup> and Marechaux et al.<sup>27</sup> The aim is to detect a difference in the primary outcome; Pulse Wave Velocity (PWV), between the five groups of patients recruited to the study with the significance level being set at 5% if the p value is less than 0.05. The estimates range from a mean PWV of 8.6 m/s for the control group to 11.3 m/s for the HFpEF group and the within group standard deviation is assumed to be SD=1.7 m/s and equal for each group. No estimate of the mean PWV was available in the literature for the hypertension and Diabetes Mellitus group, so this value was assumed to be in exactly in the middle of the hypertension and HFpEF mean. A sample size of n=11 for HFpEF patients and n=21 for all other groups will allow to detect a difference in PWV between the five groups for the aforementioned configuration of means and SD with 80% power using the overall F-test in a one-way ANOVA. The study would additionally be sufficiently powered for the pair-wise comparison of the control group with the hypertension group and the control group with the HFpEF group. Statistical analysis will be performed with IBM SPSS Statistics for Windows, version 22.0. Descriptive statistics will be given as number (percentage), as average ( $\pm$ SD) or median (interquartile range).

## Study Procedures

Participants will attend our Research Unit in the morning. To avoid confounding factors for vascular measurements, participants will be asked to abstain from caffeine and tobacco for 12 hours, and to omit their morning blood pressure medication. Vascular function studies will be carried out in a quiet, temperature-controlled (21–23 °C) room with subjects in the supine position, following at least 10 min of rest. Arterial compliance will be assessed using applanation tonometry to measure aortic PWV. Cutaneous microvascular function will be assessed by Laser Doppler Flowmetry, after which the blood test and TTE measurements will be performed. Subsequently, patients will be asked to undertake the 6-MWT and CPEX test (figure 2).

## Screening and Recruitment

*Group A:* Participants will be recruited via the UHCW Hospital Radio, senior citizen's group in the community, and via friends and relatives of colleagues. These patients will receive an invitation letter and participant information sheet to read, they will then be contacted by the study



1  
2  
3 coordinator at least 24 hours after receiving the invitation letter to answer any questions. If the  
4  
5 participant is interested in taking part in the study, they will be invited for a screening visit at UHCW  
6  
7 to confirm their eligibility. This will involve a full medical history, physical examination, blood  
8  
9 pressure measurement and blood tests (FBC, Glucose, HbA1c, and renal function). If the eligibility  
10  
11 criteria are met, the study appointment will be organised.  
12  
13  
14  
15

16  
17 *Group B and C:* Patients will be approached and screened for eligibility at the hypertension and  
18  
19 diabetes outpatient clinics at UHCW. Eligible participants will receive an invitation letter and  
20  
21 participant information sheet. They will then be contacted by the study coordinator at least 24 hours  
22  
23 later to answer any questions, and to organise a study appointment .  
24  
25  
26  
27

28  
29 *Group D and E:* Patients will be approached and screened for the eligibility criteria at the HF  
30  
31 community clinic. Eligible participants will receive an invitation letter and participant information  
32  
33 sheet. They will then be contacted by the study coordinator after at least 24 hours to answer any  
34  
35 questions, and to organise a study appointment.  
36  
37  
38  
39

#### 40 **Study Assessments**

41  
42 Participants in all groups will have the same assessments as follows (table 1):  
43  
44

##### 45 *Blood pressure and heart rate measurement*

46  
47  
48 Heart rate and one brachial blood pressure measurement will be recorded over a 30s time period.

49  
50 These measurements will be performed 3 times for each subject and averaged.  
51  
52  
53  
54

55  
56 *Blood tests* will include full blood count, renal function and electrolytes, liver function tests, NT-  
57  
58 proBNP, and high-sensitive cardiac Troponin T (hs-cTnT). Blood samples will be frozen in the Tissue  
59  
60

1  
2  
3 bank at UHCW for further tests such as vascular and other biomarkers e.g. galectin-3 to be  
4 performed at a later date.  
5  
6  
7  
8  
9

10  
11 *Urinalysis* will be performed from a mid-stream urine sample obtained for albumin and creatinine  
12 levels. This will further be stored at the Tissue Bank UHCW to be analysed at a later date for  
13 metabolite profiles (“metabolomics”), related to cardiovascular risk and insulin resistance.  
14  
15  
16  
17

18  
19  
20  
21 *Transthoracic echocardiography (TTE)* will include measurements of cardiac chamber sizes,  
22 ventricular function including LVEF, indices of LV diastolic function, assessment of valvular heart  
23 disease, tissue Doppler imaging and strain rate imaging. Furthermore, right ventricular structure and  
24 function and pulmonary artery pressures will be assessed.  
25  
26  
27  
28  
29

30  
31  
32  
33 *Exercise tolerance* will be assessed by a 6-minute walk test and a CPEX in each patient. The CPEX  
34 test will involve measurement of the oxygen consumption and carbon dioxide production and heart  
35 rate and blood pressure monitoring whilst exercising on an exercise bike.  
36  
37  
38  
39

#### 40 41 42 43 **Pulse wave velocity protocol**

44  
45 Arterial resistance will be assessed using pulse wave velocity. Aortic PWV will be evaluated using a  
46 high fidelity micromanometer (SPC-301; Millar Instruments, Texas, USA) coupled with the  
47 SphygmoCorTM system (SphygmoCor BPAS; PWV Medical, Sydney, Australia). A hand-held  
48 micromanometer-tipped probe will be applied to the skin overlying the radial, femoral and carotid  
49 arteries at the point of maximal arterial pulsation. Gated to a simultaneous electrocardiogram, the  
50 pulse wave will be recorded at each point. This data, in combination with the measured body  
51 surface distance between the two points, will be incorporated by the software program to calculate  
52  
53  
54  
55  
56  
57  
58  
59  
60

1  
2  
3 PWV in meters per second (m/s). The measurements will be repeated 3 times and the average PWV  
4  
5 will be used for analysis.  
6  
7  
8  
9

### 10 11 **Laser Doppler Flowmetry (LDF) Protocol**

12  
13 The forearm cutaneous blood flow will be measured at rest and during reactive hyperaemia by using  
14  
15 Laser Doppler Flowmetry (LDF), in accordance to the Fizeau-Doppler principle<sup>28</sup>. Measurements of  
16  
17 cutaneous blood flow will be expressed in perfusion units (PU) and the Laser Doppler signal will be  
18  
19 continuously monitored on a computer (Moor instruments, VMS software V4.06) coupled with Moor  
20  
21 instruments system (moorVMS-VASC). The thenar eminence will be used for the placement of the  
22  
23 LDF probe (VP1T/7), consistently at the same place, before and post the occlusive reactive  
24  
25 hyperaemia manoeuvre. The room temperature will be maintained at 22 degrees Celsius during  
26  
27 forearm cutaneous blood flow measurements. The reactive hyperaemia will be produced by  
28  
29 occluding the forearm blood flow with a pneumatic cuff inflated to a pressure of 50 mm Hg above  
30  
31 the Systolic Blood Pressure for 3 minutes. The signal obtained during complete arterial occlusion will  
32  
33 be taken as the biologic zero for cutaneous blood flow measurements before and during reactive  
34  
35 hyperaemia. Resting flow will be taken as the average of a 6-minute stable LDF recording. The  
36  
37 definition of the measurements taken are shown in figure 3 and the power spectral density (PSD)  
38  
39 will be measured using the basic fast Fourier transform algorithm<sup>29</sup>  
40  
41  
42  
43  
44  
45  
46  
47

### 48 **Cardio-Pulmonary Exercise Test (CPEX)**

49  
50  
51 Exercise tolerance will be assessed by 6-minute walk test and CPEX, conducted in accordance with  
52  
53 existing guidelines<sup>30 31</sup>. For the walk test, participants will walk as far as possible in six minutes along  
54  
55 a flat, obstacle free corridor, turning 180 degrees every 30m. For CPEX, participants will pedal a cycle  
56  
57 ergometer at 70 rpm until volitional fatigue, using a ramp protocol. Breath-by-breath measurement  
58  
59 of O<sup>2</sup> consumption, CO<sup>2</sup> production and ventilation will be used to determine key cardiorespiratory  
60

1  
2  
3 parameters including peak  $O^2$  uptake ( $VO^2$  peak),  $VO^2$  at the anaerobic threshold ( $VO^2$  AT) and  
4 ventilatory efficiency ( $VE/VCO^2$ ). Blood pressure, ECG and  $O^2$  saturation will be continuously  
5 monitored. Criteria for a peak test will include respiratory exchange ratio (RER)  $>1.10$ <sup>32</sup>.  
6  
7  
8  
9  
10  
11  
12  
13  
14  
15

### 16 **Blinding**

17  
18 In order to reduce observer-bias the operator involved in the assessments of the primary outcome  
19 (pulse wave velocity) will be blinded to the comorbidities of the group of patients (A to E).  
20  
21  
22  
23  
24  
25

### 26 **Primary Outcome**

27  
28 Our primary outcome will be a difference in arterial resistance between each of the five groups, as  
29 measured by aortic PWV. In addition, specific comparisons will be made between the control and  
30 hypertension groups as well as the control and HFpEF groups.  
31  
32  
33  
34  
35  
36  
37  
38

### 39 **Secondary Outcomes**

40  
41 The secondary outcomes are to assess and compare endothelial function and cardiovascular  
42 performance in all groups as measured by the following:  
43  
44  
45

- 46 • **Blood tests:** NTproBNP, high sensitivity Troponin T, Galectin-3
- 47
- 48 • **Urinalysis:** Albumin, Creatinine and Metabolite profiles (“metabolomics”), related to  
49 cardiovascular risk and insulin resistance
- 50
- 51 • **Transthoracic echocardiography (TTE)** indices of LV diastolic function, tissue Doppler imaging,  
52 strain rate imaging and measuring flow with pulsed-wave Doppler echocardiography  
53 interrogating the LV outflow tract.  
54  
55  
56  
57  
58  
59  
60

- **Exercise tolerance:** 6-minute walk test and a Cardiopulmonary Exercise Test (CPEX)

### **End of study definition**

The study will be closed at the last patient's study visit.

### **Study funding and sponsor**

The study has been funded by a research grant from the West Midlands Clinical Research Network, National Institute of Health Research, UK. The study is sponsored by the Research, Development & Innovation department of the University Hospitals Coventry & Warwickshire NHS Trust (RDI, UHCW), UK.

### **Study oversight**

The Study will be monitored and overseen by the Study Management Group and the Research, Development and Innovation Department at UHCW.

### **Ethical approval and research governance**

The study was approved by the regional research ethics committee (REC), West Midland and Black Country 17/WM/0039, UK and permission to conduct the study in the hospital was also obtained from the RDI, UHCW NHS Trust. The study will be conducted in compliance with the principles of the GCP guidelines and in accordance with all applicable regulatory guidance, including, but not limited to, the Research Governance Framework and the Health Research Authority, UK. Progress reports

1  
2  
3 and a final report at the conclusion of the study will be submitted to the approving REC within the  
4  
5 timelines defined by the committee.  
6  
7  
8  
9

### 10 **Patient and public involvement**

11 Patient involvement has been essential to the design of and protocol of the study. Consultation has  
12  
13 been obtained from patient and public involvement (PPI) representatives, which led to the tests  
14  
15 being allowed to be done over two visits after screening. The non-invasive nature of the  
16  
17 investigations has been particularly likened by the PPI representative. Furthermore, optional  
18  
19 transport was provided to participants after their recommendation. Patients seen in the relevant  
20  
21 outpatient department will be invited to participate in the study. On-going PPI input will occur  
22  
23 during study steering committee. The results of the study will be disseminated to all the participants  
24  
25 via post.  
26  
27  
28  
29  
30  
31

### 32 **Dissemination and impact**

33 The hypothesis on which this study is based has been published.**Error! Bookmark not defined.** The  
34  
35 results of the study will be presented at national and international conferences and released in  
36  
37 appropriate media outlets, including social media. The results are expected to be published in peer-  
38  
39 reviewed journals and presented in local, national and international medical scientific congresses  
40  
41 and meetings. The study is anticipated to shed light on whether vascular stiffness is an important  
42  
43 determinant of HFpEF which in turn could potentially encourage research for new therapeutic  
44  
45 targets.  
46  
47  
48  
49  
50  
51

### 52 **Competing interest**

53  
54  
55  
56 None declared  
57  
58  
59  
60

1  
2  
3  
4  
5  
6  
7  
8  
9  
10  
11  
12  
13  
14  
15  
16  
17  
18  
19  
20  
21  
22  
23  
24  
25  
26  
27  
28  
29  
30  
31  
32  
33  
34  
35  
36  
37  
38  
39  
40  
41  
42  
43  
44  
45  
46  
47  
48  
49  
50  
51  
52  
53  
54  
55  
56  
57  
58  
59  
60

For peer review

### Contributors

Contributor PB is the chief investigator for the study and DA leading on writing the protocol, ethics application and preparation of this manuscript. FC, MW, MM all contributed fully to study design. GM, NC, SM, SE and RP contributed from their respective discipline and authored the relevant section of the protocol and manuscript. All authors read and approved the final version of the manuscript.

Table 1: Schedule of measures for every participant within the study.

GROUP A ONLY: SEPARATE SCREENING VISIT PRIOR TO THE STUDY VISIT TO CHECK THAT THE PARTICIPANTS MEET THE ELIGIBILITY CRITERIA. FULL MEDICAL HISTORY, PHYSICAL EXAMINATION,

---

## BLOOD PRESSURE AND BLOOD TESTS (FBC, GLUCOSE, HBA1C, AND RENAL FUNCTION).

| TIME OF DAY      | Procedures/Assessments*                                                                                                                                                                                                                                            |
|------------------|--------------------------------------------------------------------------------------------------------------------------------------------------------------------------------------------------------------------------------------------------------------------|
| <b>MORNING</b>   | <b>Eligibility check</b>                                                                                                                                                                                                                                           |
|                  | <b>Informed consent</b>                                                                                                                                                                                                                                            |
|                  | <b>Demographic data</b> ( <i>DOB, sex, ethnicity, height and weight</i> )                                                                                                                                                                                          |
|                  | <b>Relevant clinical history</b>                                                                                                                                                                                                                                   |
|                  | <b>Current medications</b>                                                                                                                                                                                                                                         |
|                  | <b>Blood pressure and Heart rate</b>                                                                                                                                                                                                                               |
|                  | <b>Pulse Wave velocity (PWV)</b> <i>to measure arterial resistance</i>                                                                                                                                                                                             |
|                  | <b>Laser Doppler</b> <i>to measure microvascular function</i>                                                                                                                                                                                                      |
|                  | <b>Blood tests:</b> <i>Full blood count, renal function and electrolytes, liver function tests, NT-proBNP, high-sensitive cardiac Troponin T (hs-cTnT). Samples will be frozen and stored for future analysis of vascular and other biomarkers e.g. Galectin-3</i> |
|                  | <b>Urine test:</b> <i>Albumin and Creatinine. Samples will be frozen and stored for future analysis of metabolite profiles</i>                                                                                                                                     |
| <b>LUNCH</b>     |                                                                                                                                                                                                                                                                    |
| <b>AFTERNOON</b> | <b>Transthoracic echocardiography (TTE):</b> <i>tissue Doppler imaging and strain rate imaging</i>                                                                                                                                                                 |
|                  | <b>6-minute walk test</b>                                                                                                                                                                                                                                          |
|                  | <b>Cardiopulmonary Exercise Test (CPEX)</b>                                                                                                                                                                                                                        |

All assessments will be aimed to be completed in a single visit. However, a possible second visit can be arranged either at Atrium Health or University Hospitals Coventry and Warwickshire NHS Trust for completion of all assessments, if require.



### 13. References

<sup>1</sup> Cook C, Cole G, Asaria P, Jabbour R, Francis DP, The annual global economic burden of heart failure. *Int J Cardiol* (2014);171(3):368-76

<sup>2</sup> <https://www.nice.org.uk/guidance/cg108>

<sup>3</sup> Yancy CW, Lopatin M, Stevenson LW, De Marco T, Fonarow GC, Committee ASA, et al. Clinical presentation, management, and in-hospital outcomes of patients admitted with acute decompensated heart failure with preserved systolic function: a report from the Acute Decompensated Heart Failure National Registry (ADHERE) Database. *J Am Coll Cardiol*. 2006

- 1  
2  
3  
4  
5  
6  
7  
8  
9  
10  
11  
12  
13  
14  
15  
16  
17  
18  
19  
20  
21  
22  
23  
24  
25  
26  
27  
28  
29  
30  
31  
32  
33  
34  
35  
36  
37  
38  
39  
40  
41  
42  
43  
44  
45  
46  
47  
48  
49  
50  
51  
52  
53  
54  
55  
56  
57  
58  
59  
60
- 
- <sup>4</sup> Chan MM, Lam CS. How do patients with heart failure with preserved ejection fraction die? *Eur J Heart Fail.* 2013; 15(6):604–13. [PubMed: 23610137]
- <sup>5</sup> Massie BM, Carson PE, McMurray JJ, Komajda M, McKelvie R, Zile MR, et al. Irbesartan in patients with heart failure and preserved ejection fraction. *N Engl J Med.* 2008; 359(23):2456–67.
- <sup>6</sup> Banerjee P. Heart failure with preserved ejection fraction. A clinical crisis. *Int J Cardiol.* 2016 Feb 1;204:198-9. doi: 10.1016/j.ijcard.2015.11.170. Epub 2015 Nov 24. PMID: 26670172.
- <sup>7</sup> Zakeri R, Cowie MR. Heart failure with preserved ejection fraction: controversies, challenges and future directions *Heart* Published Online First: 05 January 2018. doi: 10.1136/heartjnl-2016-310790.
- <sup>8</sup> Shah SJ, Kitzman DW, Borlaug BA, et al., Phenotype-Specific Treatment of Heart Failure With Preserved Ejection Fraction. A Multiorgan Roadmap, *Circulation.* 2016;134:73-90. DOI: 10.1161/CIRCULATIONAHA.116.021884
- <sup>9</sup> Paulus WJ, Tschope C. A Novel Paradigm for Heart Failure with Preserved Ejection Fraction: Comorbidities Drive Myocardial Dysfunction and Remodeling Through Coronary Microvascular Endothelial Inflammation. *J Am Coll Cardiol.* 2013; 62:263–71
- <sup>10</sup> Marechaux S, Vascular and Microvascular Endothelial Function in Heart Failure With Preserved Ejection Fraction, *Journal of Cardiac Failure* Vol. 22 No. 1 2016
- <sup>11</sup> McMurray JJ, Adamopoulos S, Anker SD, et al., ESC Guidelines for the diagnosis and treatment of acute and chronic heart failure 2012: The Task Force for the Diagnosis and Treatment of Acute and Chronic Heart Failure 2012 of the European Society of Cardiology. Developed in collaboration with the Heart Failure Association (HFA) of the ESC. *Eur Heart J* 2012;33:1787–1847.
- <sup>14</sup> Borbely A, van der Velden J, Papp Z, Bronzwaer JG, Edes I, Stienen GJ, Paulus WJ. Cardiomyocyte stiffness in diastolic heart failure. *Circulation* 2005; 111:774 –781
- <sup>15</sup> Balmain S, Differences in arterial compliance, microvascular function and venous capacitance between patients with heart failure and either preserved or reduced left ventricular systolic function, *European Journal of Heart Failure* 9 (2007) 865–871
- <sup>16</sup> Marechaux S, Vascular and Microvascular Endothelial Function in Heart Failure With Preserved Ejection Fraction, *Journal of Cardiac Failure* Vol. 22 No. 1 2016
- <sup>17</sup> Jamil Mayet, Alun Hughes. Cardiac and vascular pathophysiology in hypertension. *Heart.* 2003 September; 89(9): 1104–1109.
- <sup>18</sup> Stehouwer C.D., Henry R.M., Ferreira I. Arterial stiffness in diabetes and the metabolic syndrome: A pathway to cardiovascular disease. *Diabetologia.* 2008;51:527–539. doi: 10.1007/s00125-007-0918-3.

1  
2  
3  
4  
5  
6  
7  
8  
9  
10  
11  
12  
13  
14  
15  
16  
17  
18  
19  
20  
21  
22  
23  
24  
25  
26  
27  
28  
29  
30  
31  
32  
33  
34  
35  
36  
37  
38  
39  
40  
41  
42  
43  
44  
45  
46  
47  
48  
49  
50  
51  
52  
53  
54  
55  
56  
57  
58  
59  
60

---

<sup>19</sup> M. C. Wang, W. C. Tsai, J. Y. Chen, M. F. Cheng, and J. J. Huang, "Arterial stiffness correlated with cardiac remodelling in patients with chronic kidney disease," *Nephrology*, vol. 12, no. 6, pp. 591–597, 2007.

<sup>20</sup> AlGhatrif M, Strait JB, Morrell CH, Canepa M, Wright J, Elango P, Scuteri A, Najjar SS, Ferrucci L, Lakatta EG. Longitudinal trajectories of arterial stiffness and the role of blood pressure: the Baltimore Longitudinal Study of Aging. *Hypertension*. 2013;62:934–941

<sup>21</sup> Gary Mitchell, Effects of central arterial aging on the structure and function of the peripheral vasculature: implications for end-organ damage, *J Appl Physiol* (1985). 2008 Nov; 105(5): 1652–1660.

<sup>22</sup> Banerjee P. Heart failure: a story of damage, fatigue and injury? *Open Heart* 2017; 4:e000684. doi: 10.1136/openhrt-2017-000684

<sup>22</sup> Remes J, Miettinen H, Reunanen A, Pyorala K. Validity of clinical diagnosis of heart failure in primary health care. *Eur Heart J* 1991;12(3): 315–21.

<sup>22</sup> Schiller NB, Shah PM, Crawford M, et al. Recommendations for quantitation of the left ventricle by two-dimensional echocardiography. American Society of Echocardiography Committee on Standards, Subcommittee on Quantitation of Two-Dimensional Echocardiograms. *J Am Soc Echocardiogr* 1989;2(5):358–67.

<sup>22</sup> [www.diabetes.org.uk](http://www.diabetes.org.uk)

<sup>22</sup> Balmain S, Differences in arterial compliance, microvascular function and venous capacitance between patients with heart failure and either preserved or reduced left ventricular systolic function, *European Journal of Heart Failure* 9 (2007) 865–871

<sup>22</sup> Marechaux S, Vascular and Microvascular Endothelial Function in Heart Failure With Preserved Ejection Fraction, *Journal of Cardiac Failure* Vol. 22 No. 1 2016

<sup>22</sup> Roustit M, Cracowski JL. Non-invasive assessment of skin microvascular function in humans: an insight into methods. *Microcirculation* 2011; 19:47e64.

<sup>22</sup> Marechaux S, Vascular and Microvascular Endothelial Function in Heart Failure With Preserved Ejection Fraction, *Journal of Cardiac Failure* Vol. 22 No. 1 2016

<sup>22</sup> Holland, A.E., et al., An official European Respiratory Society/American Thoracic Society technical standard: field walking tests in chronic respiratory disease. *Eur Respir J*, 2014. 44(6): p. 1428-46.

<sup>23</sup> Remes J, Miettinen H, Reunanen A, Pyorala K. Validity of clinical diagnosis of heart failure in primary health care. *Eur Heart J* 1991;12(3): 315–21.

<sup>24</sup> Schiller NB, Shah PM, Crawford M, et al. Recommendations for quantitation of the left ventricle by two-dimensional echocardiography. American Society of Echocardiography Committee on

1  
2  
3  
4 Standards, Subcommittee on Quantitation of Two-Dimensional Echocardiograms. *J Am Soc*  
5 *Echocardiogr* 1989;2(5):358–67.  
6

7  
8 <sup>25</sup> [www.diabetes.org.uk](http://www.diabetes.org.uk)  
9

10 <sup>26</sup> Balmain S, Differences in arterial compliance, microvascular function and venous capacitance  
11 between patients with heart failure and either preserved or reduced left ventricular systolic  
12 function, *European Journal of Heart Failure* 9 (2007) 865–871  
13

14  
15 <sup>27</sup> Marechaux S, Vascular and Microvascular Endothelial Function in Heart Failure With Preserved  
16 Ejection Fraction, *Journal of Cardiac Failure* Vol. 22 No. 1 2016  
17

18  
19 <sup>28</sup> Roustit M, Cracowski JL. Non-invasive assessment of skin microvascular function in humans: an  
20 insight into methods. *Microcirculation* 2011; 19:47e64.  
21

22  
23 <sup>29</sup> Marechaux S, Vascular and Microvascular Endothelial Function in Heart Failure With Preserved  
24 Ejection Fraction, *Journal of Cardiac Failure* Vol. 22 No. 1 2016  
25

26  
27 <sup>30</sup> Holland, A.E., et al., An official European Respiratory Society/American Thoracic Society technical  
28 standard: field walking tests in chronic respiratory disease. *Eur Respir J*, 2014. 44(6): p. 1428-46.  
29

30  
31 <sup>31</sup> Ross, R.M., ATS/ACCP statement on cardiopulmonary exercise testing. *Am J Respir Crit Care Med*,  
32 2003. 167(10): p. 1451; author reply 1451.  
33

34  
35 <sup>32</sup> Balady, G.J., et al., Clinician's Guide to cardiopulmonary exercise testing in adults: a scientific  
36 statement from the American Heart Association. *Circulation*, 2010. 122(2): p. 191-225.  
37  
38  
39  
40  
41  
42  
43  
44  
45  
46  
47  
48  
49  
50  
51  
52  
53  
54  
55  
56  
57  
58  
59  
60

1  
2  
3  
4  
5  
6  
7  
8  
9  
10  
11  
12  
13  
14  
15  
16  
17  
18  
19  
20  
21  
22  
23  
24  
25  
26  
27  
28  
29  
30  
31  
32  
33  
34  
35  
36  
37  
38  
39  
40  
41  
42  
43  
44  
45  
46  
47  
48  
49  
50  
51  
52  
53  
54  
55  
56  
57  
58  
59  
60

Figure 1: Overview of the hypothesis behind the IDENTIFY-HF study

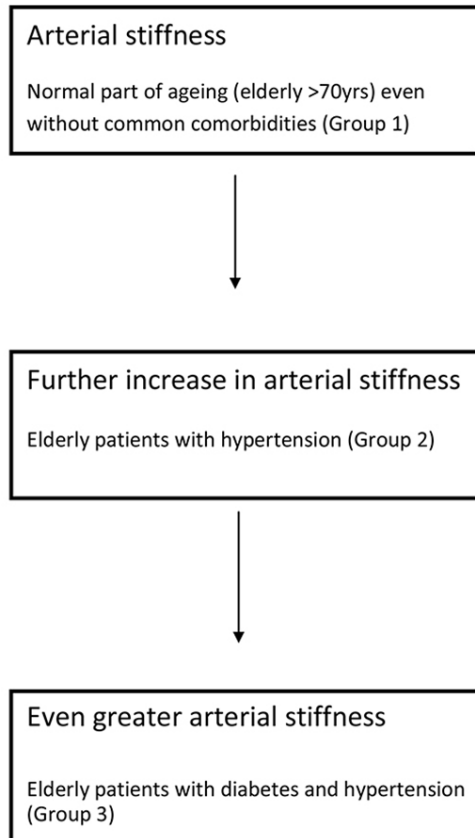

Figure 1: Overview of the hypothesis behind the IDENTIFY-HF study

90x90mm (300 x 300 DPI)

Figure 2: Study Flow Chart



Figure 2: Study Flow Chart

90x90mm (300 x 300 DPI)

Figure 3: Laser Doppler Flowmetry for assessment of endothelial function. Schematic representation of flow (perfusion units) as a function of time in rest, after arterial occlusion and after cuff release. (adapted with permission of Moor Diagnostics)

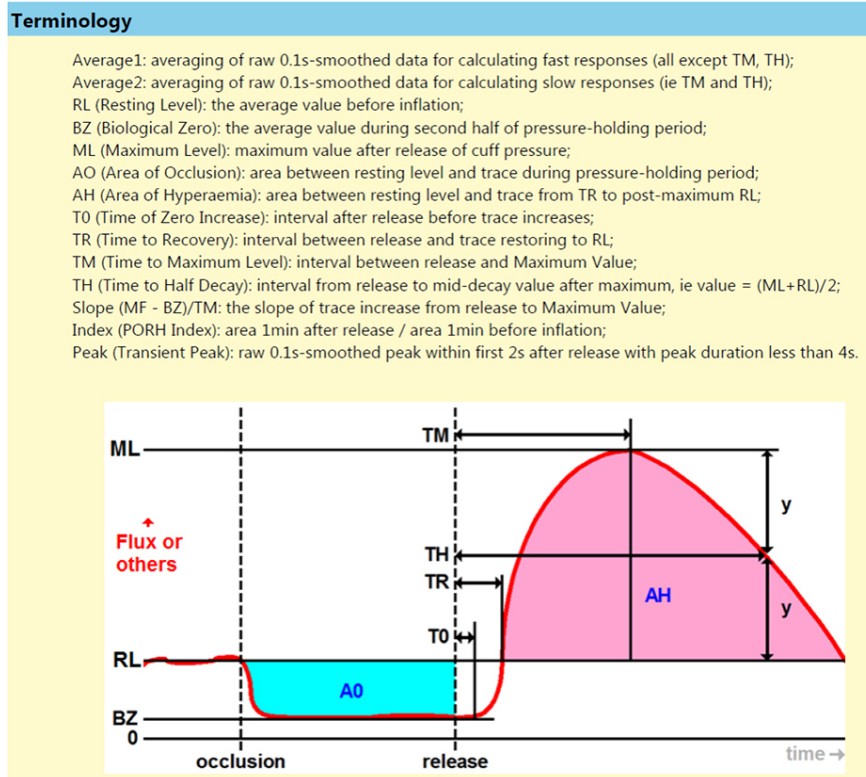

Figure 3

90x90mm (300 x 300 DPI)
